# Supplementary material for: The functionality of surface hydroxyls on selective CH4 generation from photoreduction of CO2 over SiC nanosheets
Source: Royal Society of Chemistry journal article supplement (doi:10.1039/c8cc09371g), 2019-01-01
Supplement: c8cc09371g1.pdf [file c8cc09371g1.pdf]

Electronic Supplementary Material (ESI) for

**The functionality of surface hydroxyls on selective CH<sub>4</sub> generation  
from photoreduction of CO<sub>2</sub> over SiC nanosheets**

Cheng Han,<sup>a</sup> Yongpeng Lei,<sup>b,c</sup> Bing Wang,<sup>a</sup> Chunzhi Wu,<sup>a</sup> Shujin Shen,<sup>a</sup> Xiaoshan Zhang,<sup>a</sup>  
Lian Sun,<sup>a</sup> Qiong Tian,<sup>a</sup> Qingguo Feng,<sup>d,e</sup> and Yingde Wang<sup>\*a</sup>

<sup>a</sup>Science and Technology on Advanced Ceramic Fiber and Composites Laboratory, College of Aerospace Science and Engineering, National University of Defense Technology, Changsha 410073, China. Email: wangyingde@nudt.edu.cn; ORCID: 0000-0001-8615-194X.

<sup>b</sup>State Key Laboratory for Powder Metallurgy, Central South University, Changsha 410083, China.

<sup>c</sup>Hunan Provincial Key Laboratory of Chemical Power Sources, College of Chemistry and Chemical Engineering, Central South University, Changsha 410083, China.

<sup>d</sup>Key Laboratory of Advanced Technologies of Materials, Ministry of Education, and Institute of Materials Dynamics, Southwest Jiaotong University, Chengdu, 610031, China.

<sup>e</sup>National Joint Engineering Laboratory of Power Grid with Electric Vehicles, Shandong University, Jinan 250061, China.

## 1. Experimental details

### Synthesis of ultrathin SiC nanosheets with different surface component (SiC\_700, SiC\_HF and SiC\_KOH)

SiC nanosheets were synthesized via a template-assisted carbonthermal process as described in our previous reports.<sup>S1</sup> Typically, graphite oxide (GO) solution with a concentration of 5 mg mL<sup>-1</sup> was hydro-thermally treated and then freeze-dried to obtain reduced GO (rGO) monoliths, which was thereby loaded on a graphite sieve in a corundum crucible, at the bottom of which excessive Si powder was added previously. Subsequently the crucible was heated at 1400 °C for 3 hours under Ar atmosphere (with a heating rate of 5 °C·min<sup>-1</sup>). During this process, rGO nanosheets severed as both the carbon source and the morphology template for the growth of SiC. The products were further calcinated at 700 °C in air to remove residual carbon and the obtained sample was labeled as **SiC\_700**. To remove the SiO<sub>2</sub> shell, the SiC\_700 was then immersed into a 5% HF solution<sup>S2</sup> or 2M KOH solution<sup>S3</sup> and stirred for 30 min. After thoroughly washing with deionized water, the final samples were labeled as **SiC\_HF** and **SiC\_KOH**, respectively.

### Characterization

The microstructure were observed using a Titan G2 60-300 TEM machine. FT-IR spectra were collected on a Nicolet Nexus 6700 spectrometer in transmittance mode (pellets with KBr). XPS was conducted on a Thermo Scientific ESCALAB 250Xi machine with an Al K $\alpha$  source. N<sub>2</sub> and CO<sub>2</sub> adsorption isotherms were performed on an ASAP2020M apparatus. The samples were thoroughly degassed in vacuum at 200 °C for 10 h, and then measured at 77 K and 273 K to determine N<sub>2</sub> and CO<sub>2</sub> adsorption, respectively. The BET surface area was evaluated from N<sub>2</sub> adsorption data.

### Photocatalytic reduction of CO<sub>2</sub>

Photocatalytic reduction of CO<sub>2</sub> was carried out in a home-made cylinder reactor (60 mL) with a quartz cover involving a gas-solid heterogeneous reaction. For a typical test, 10 mg sample was dispersed into deionized water under sonication to get a homogeneous ink, which was then poured into a petri dish. After evaporation at 120 °C, the catalyst was deposited as a thin film, which was then placed into the reactor supported by a glass holder. After sealing, the

photoreactor was vacuumed at -0.1 MPa (relative pressure) for 20 min, and CO<sub>2</sub> (99.999%) was subsequently introduced into the reactor. The vacuum-filtration process was repeated 5 times. After that, 100  $\mu$ L ultrapure H<sub>2</sub>O was injected into the reactor *via* the silicone rubber septum and dispersed homogeneously on the bottom. A 300 W CEL-HXF300 Xe lamp was placed 10 cm away from the reactor and used as the source of UV-visible light. Each test was typically performed under 4 h irradiation. During the test, the temperature in reactor was kept constant by cooling water. Certain amount of gases mixture would be taken and analyzed by a gas chromatography (SP6890) equipped with a flame ionized detector (FID) and methanizer. The produced gases were calibrated with a standard gas mixture and the identity was determined by the retention time.

### **Computational details**

In this work the absorption of molecules and relative chemical processes on SiC (111) surface were investigated. The SiC was cut from bulk along the [111] direction and then constructed a 4 $\times$ 4 $\times$ 1 supercell including 4 layers of SiC sheets and each layer had 16 Si and 16 C atoms. The vacuum was added in Z-direction and translation invariances in X & Y directions were kept in order to simulate a surface. The cell and atomic coordinates were then fully relaxed with the density functional theory method implemented in the Vienna Ab-initio Simulation Package (VASP)<sup>S4</sup> and with the PBE functional<sup>S5</sup> until the residual forces was less than 0.01 eV/Å. The convergence of electronic energy was set to be less than 1E-6 eV. The energy cutoff was adopted as 550 eV and a 3 $\times$ 3 $\times$ 1 Gamma centered k mesh is used to sample the Brillouin zone. Moreover, the grimme-D2 correction<sup>S6</sup> was involved to taken into account the possible hydrogen bonding and Van der Waals forces.

**Table S1** Elemental compositions of SiC\_700, SiC\_HF and SiC\_KOH from XPS results..

| Sample  | Atomic % |       |       |      | Surface groups       |
|---------|----------|-------|-------|------|----------------------|
|         | C        | Si    | O     | F    |                      |
| SiC_700 | 34.2     | 40.0  | 25.8  | —    | SiO <sub>2</sub>     |
| SiC_HF  | 48.03    | 41.26 | 9.26  | 1.46 | Si-F, Si-H, C-H, -OH |
| SiC_KOH | 44.19    | 43.55 | 12.26 | —    | Si-OH, C-OH          |

As presented in Table S1, a significant fraction of oxygen in the SiC\_700 is due to the presence of oxide layer, while for the SiC\_KOH or SiC\_HF it relates to surface hydroxyls. The presence of fluorine in SiC\_HF clearly indicates the existence of fluorinated surface species. The listed surface groups will be discussed in the following XPS spectra.

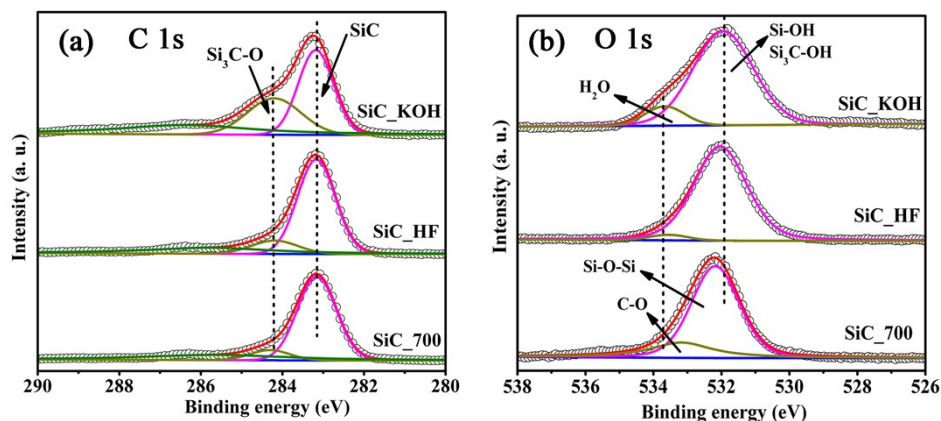

**Fig. S1** (a) C 1s and (b) O 1s XPS spectra of SiC\_700, SiC\_HF and SiC\_KOH.

The C 1s spectrum of SiC\_700 presents a main peak of 283.1 eV originating from the C-Si bonds of SiC. In its O 1s spectrum, the main component at 532.3 eV is ascribed to Si-O-Si fragments in SiO<sub>2</sub> and silicon oxocarbide, while another peak corresponds to C-O fragments (533.2 eV). Treatment of oxidized sample with HF or KOH does not significantly affect the peak positions of C 1s spectrum but the relative intensity of 284.2 eV is enhanced. Probably, the oxide removal resulted in some surface relaxation as well as formation of interfacial Si<sub>3</sub>C-OH groups, described in Ref S2. Especially, the removal of the oxide layer by KOH solution resulted in the surface covered with more abundant -OH groups than HF treating. The O 1s spectrum of SiC\_HF or SiC\_KOH is deconvoluted into 531.9 eV (surface hydroxyls) and 534.8 eV (H<sub>2</sub>O) components. The coverage of -OH groups should influence the hydrophilicity and contribute to absorb H<sub>2</sub>O molecules on SiC\_KOH.

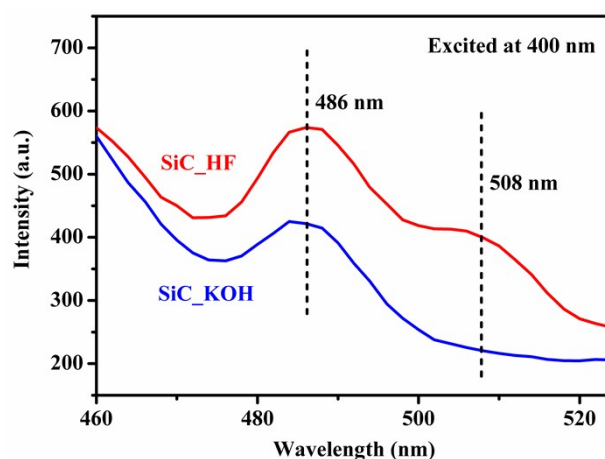

**Fig. S2** PL spectra of SiC\_KOH and SiC\_HF in water suspensions with the excitation wavelength of 400 nm.

As described in a previous report,<sup>S7</sup> the surface/water-molecule states caused by the OH<sup>-</sup> and H<sup>+</sup> bonding processes play an essential role in the emergence of an additional PL band at ~510 nm in the water suspension of SiC nanocrystals. Inspired by this work, we measured the PL spectra of SiC\_HF and SiC\_KOH to analyse the differences in their surface states. The samples were dispersed in pure water and sonicated for about 3 hours. After quietly standing overnight, the supernatant was taken out for analysis. As shown in Fig. S2, under the excitation wavelength of 400 nm, both SiC\_HF and SiC\_KOH presented a blue band at 486 nm corresponding to the band-gap recombination. A green band at ~508 nm was observed using SiC\_HF, which was related to the complex consisting of the rearranged surface together with -OH and -H groups. While for SiC\_KOH, the absence of green band implied that a large portion of surface terminations was occupied by abundant -OH groups, since the introduction of excess -OH can easily damage the surface luminescent centers.<sup>S7</sup>

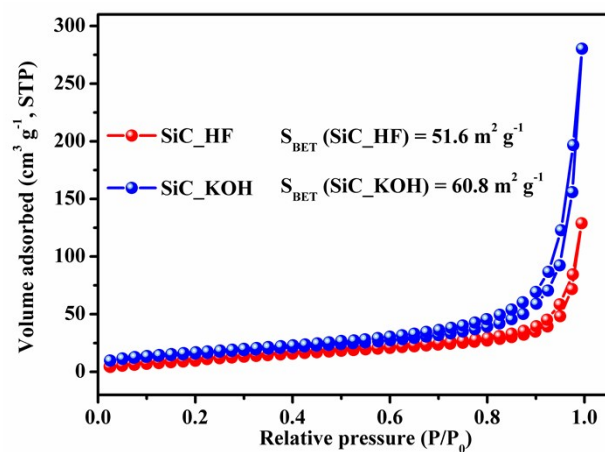

**Fig. S3** Nitrogen adsorption-desorption isotherms of SiC\_HF and SiC\_KOH.

The BET surface area of SiC\_KOH ( $60.8 \text{ m}^2 \text{ g}^{-1}$ ) is close to that of SiC\_HF ( $51.6 \text{ m}^2 \text{ g}^{-1}$ ) (Fig. S2), so the much higher  $\text{CO}_2$  uptake of SiC\_KOH should be contributed by the abundant surface -OH groups, which serve as the active sites for strongly adsorbing and activating  $\text{CO}_2$  molecules.

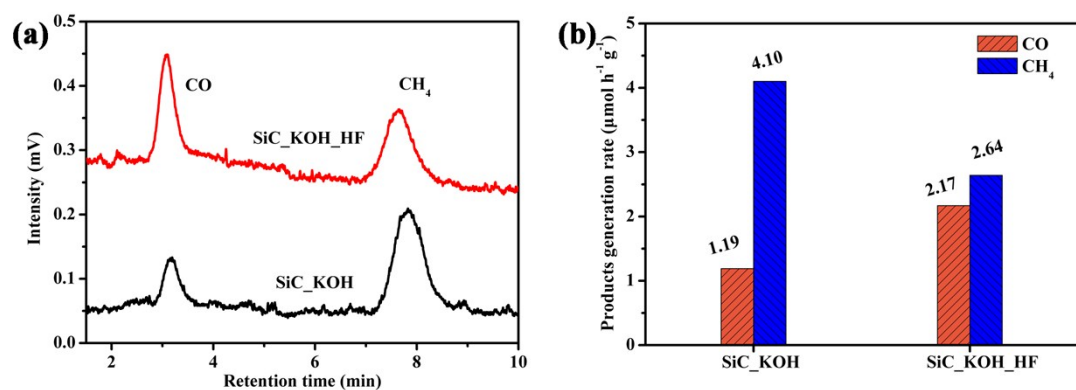

**Fig. S4** (a) Original GC records and (b) corresponding generation rate of CO and CH<sub>4</sub> products from photoreduction of CO<sub>2</sub> for 2 h.

We tried removing surface -OH groups on SiC\_KOH by further treating with HF solution. The obtained sample, denoted as SiC\_KOH\_HF, exhibited inferior performance in photocatalytic activity and CH<sub>4</sub> selectivity as that of SiC\_KOH. That was to say, the abundant -OH groups on SiC\_KOH could selectively improve the yield of CH<sub>4</sub>, a more desired product from photocatalytic CO<sub>2</sub> reduction.



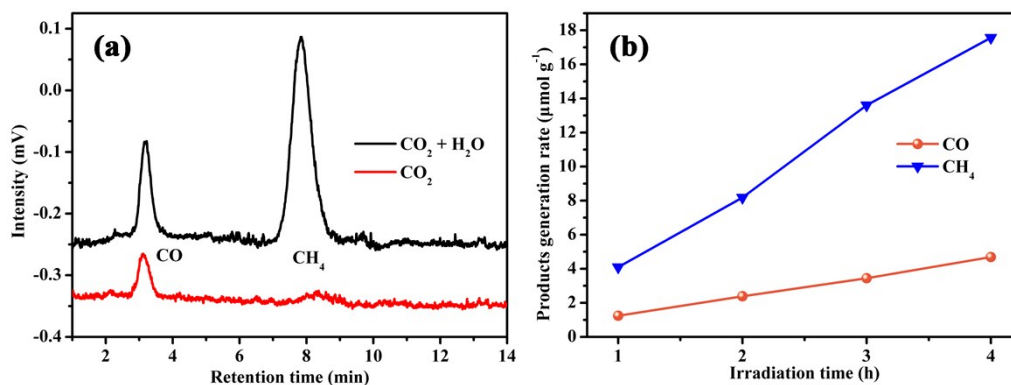

**Fig. S5** (a) Original GC records of the products from photoreduction of  $\text{CO}_2$  with or without the addition of  $\text{H}_2\text{O}$  into the photoreactor, (b) time course evolution of  $\text{CH}_4$  or CO production over 10 mg SiC\_KOH under solar light irradiation for 4 h.

Photocatalytic reduction of  $\text{CO}_2$  was operated in a gas-solid reaction mode with the participation of  $\text{H}_2\text{O}$  vapor. CO and  $\text{CH}_4$  were detected in the products. A contrast experiment was also performed under  $\text{CO}_2$  without additional  $\text{H}_2\text{O}$  (Fig. S3). CO and  $\text{CH}_4$  could also be detected although with low yields, which could be contributed by the surface -OH species. We inferred that the surface -OH species on SiC nanosheets could serve as local protons source directly participating in  $\text{CO}_2$  reduction reaction. The decreased supply of  $\text{H}_2\text{O}$  vapor had less influence on the generation of CO because it required less hydrogen protons than  $\text{CH}_4$ . The products evolution over SiC\_KOH exhibited linear growth, indicating a stable reactivity of  $\text{CO}_2$  reduction.

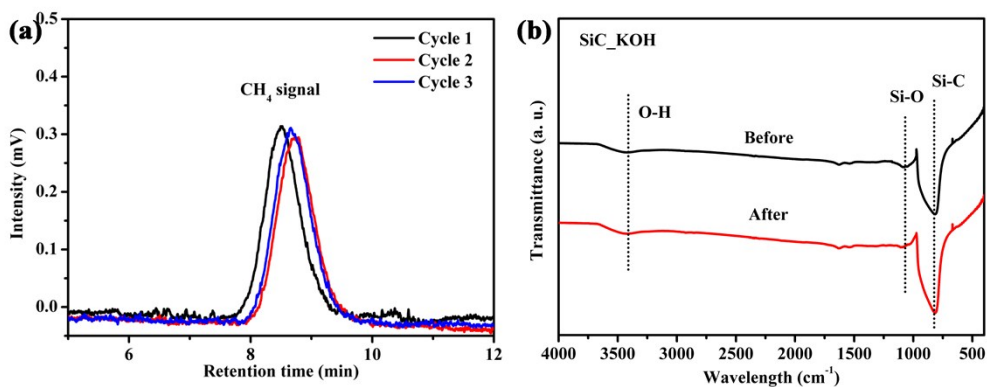

**Fig. S6** (a) Original GC records of the  $\text{CH}_4$  product from photoreduction of  $\text{CO}_2$  in three successive cycles and (b) FTIR spectra of SiC\_KOH before and after cycles test.

The hydroxylated SiC nanosheets (SiC\_KOH) presented good stability in photocatalytic performance of  $\text{CH}_4$  generation from  $\text{CO}_2$  reduction. As has been demonstrated that the surface -OH groups on SiC nanoparticles would easily recover in  $\text{H}_2\text{O}$  atmosphere once they were removed or consumed by  $\text{CO}_2$  hydrogenation reaction.<sup>S8</sup> It also meant that the surface Si-O-Si bridge bonds would easily turn to be two Si-OH bonds. In our case, the FTIR spectrum after cycles test confirmed the recovery of surface -OH groups.

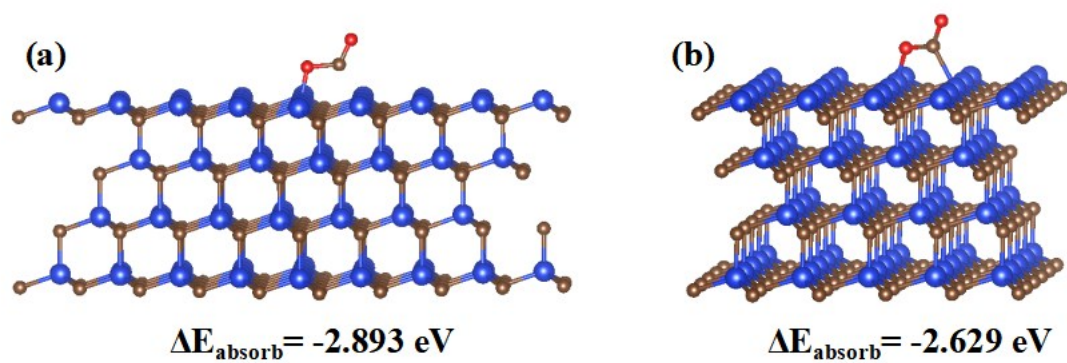

**Fig. S7** Comparative configurations of absorbed  $\text{CO}_2$  on  $\text{SiC}(111)$  surface. The absorption energy is obtained with the definition  $\Delta E = E(\text{SiC} + \text{CO}_2) - E(\text{SiC}) - E(\text{CO}_2)$ .

## References

- S1. a) L. Sun, C. Han, N. Wu, B. Wang and Y. Wang, *RSC Adv.*, 2018, **8**, 13697; b) C. Han, Y. Lei, B. Wang and Y. Wang, *ChemSusChem*, 2018, **11**, 4237.
- S2. S. Alekseev, E. Shamatulskaya, M. Volvach, S. Gryn, D. Korytko, I. Bezverkhyy, V. Iablokov and V. Lysenko, *Langmuir*, 2017, **33**, 13561.
- S3. Z. Li, J. Zhao, M. Zhang, J. Xia and A. Meng, *Nano Res.*, 2014, **7**, 462.
- S4. a) G. Kresse and J. Hafner, *Phys. Rev. B*, 1993, **47**, 558; b) G. Kresse and J. Hafner, *Phys. Rev. B*, 1994, **49**, 14251; c) G. Kresse and J. Furthmüller, *Comput. Mater. Sci.*, 1996, **6**, 15; d) G. Kresse and J. Furthmüller, *Phys. Rev. B*, 1996, **54**, 11169.
- S5. J. P. Perdew, K. Burke and M. Ernzerhof, *Phys. Rev. Lett.*, 1996, **77**, 3865.
- S6. S. Grimme, *J. Comp. Chem.*, 2006, **27**, 1787.
- S7. X. L. Wu, S. J. Xiong, J. Zhu, J. Wang, J. C. Shen and P. K. Chu, *Nano Lett.*, 2009, **9**, 4053.
- S8. Y. Peng, L. Wang, Q. Luo, Y. Cao, Y. Dai, Z. Li, H. Li, X. Zeng, W. Yan, J. Yang and J. Zeng, *Chem*, 2018, **4**, 1.
